# Supplementary material for: Assessment of the Telomere Length and Its Effect on the Symptomatology of Parkinson’s Disease
Source: MDPI journal article supplement (doi:10.3390/antiox10010137), 2021-01-19
Supplement: s1 [file s1]

## Supplementary Material

**Table S1: The effect of the relative TL on the occurrence of dementia in PD patients.**

|                 | <b>OR</b> | <b>95%CI</b> | <b>p-value</b> |
|-----------------|-----------|--------------|----------------|
| Telomere length | 0.15      | 0.03–0.88    | <b>0.024</b>   |

### Adjustment for age at inclusion and disease duration

|                  | <b>OR</b> | <b>95%CI</b> | <b>p-value</b>   |
|------------------|-----------|--------------|------------------|
| Telomere length  | 0.56      | 0.097–3.26   | 0.509            |
| Age at inclusion | 1.18      | 1.11–1.25    | <b>&lt;0.001</b> |
| Disease duration | 1.13      | 1.07–1.19    | <b>&lt;0.001</b> |

**Table S2: The effect of the relative TL on the current LED which reflects the symptomatology of Parkinson's disease.**

|                 | <b>B</b> | <b>95% CI</b> | <b>p-value</b> |
|-----------------|----------|---------------|----------------|
| Telomere length | -36.39   | -407.7–334.9  | 0.847          |

### Adjustment for age at inclusion and disease duration

|                  | <b>B</b> | <b>95% CI</b>  | <b>p-value</b>  |
|------------------|----------|----------------|-----------------|
| Telomere length  | 18.34    | -309.11–345.79 | 0.912           |
| Age at inclusion | -9.87    | -16.91 –-2.83  | <b>0.00623</b>  |
| Disease duration | 38.32    | 28.44 –48.20   | <b>9.07e-13</b> |

### Adjustment for the genetic factors of the oxidative stress pathway

|                       | <b>B</b> | <b>95% CI</b>  | <b>p-value</b>  |
|-----------------------|----------|----------------|-----------------|
| Telomere length       | 14.48    | -317.69–346.65 | 0.932           |
| Age at inclusion      | -9.96    | -17.09 –-2.82  | <b>0.00649</b>  |
| Disease duration      | 38.48    | 28.45 –48.51   | <b>1.55e-12</b> |
| <i>GPX1</i> rs1050450 | -22.29   | -133.36–88.78  | 0.693           |
| <i>CAT</i> rs10836235 | -11.82   | -157.59–133.96 | 0.873           |
| <i>CAT</i> rs1001179  | -17.13   | -141.05–106.79 | 0.785           |
| <i>SOD2</i> rs4880    | 26.94    | -69.82–123.71  | 0.584           |

### Adjustment for the genetic factors of the inflammation pathway

|                       | <b>B</b> | <b>95% CI</b>  | <b>p-value</b>  |
|-----------------------|----------|----------------|-----------------|
| Telomere length       | 43.58    | -285.74–372.89 | 0.794           |
| Age at inclusion      | -9.70    | -16.77 –-2.61  | <b>0.00760</b>  |
| Disease duration      | 37.63    | 27.60–47.66    | <b>4.08e-12</b> |
| <i>IL1B</i> rs16944   | 13.68    | -140.2–167.62  | 0.861           |
| <i>IL1B</i> rs1143623 | 104.55   | -61.12–270.23  | 0.215           |
| <i>TNFA</i> rs1800629 | 1.67     | -129.13–132.47 | 0.980           |
| <i>IL6</i> rs1800795  | -62.03   | -167.78–43.73  | 0.249           |

**Table S3: Effect of the relative TL on the time to occurrence of motor fluctuations.**

|                        | <b>HR</b> | <b>95% CI</b> | <b>p-value</b> |
|------------------------|-----------|---------------|----------------|
| <b>Telomere length</b> | 3.24      | 1.28–8.21     | <b>0.0134</b>  |

**Adjustment for age at inclusion and disease duration**

|                         | <b>HR</b> | <b>95% CI</b> | <b>p-value</b>  |
|-------------------------|-----------|---------------|-----------------|
| <b>Telomere length</b>  | 2.54      | 0.90–7.14     | 0.0781          |
| <b>Age at inclusion</b> | 0.95      | 0.93–0.97     | <b>5.34e-06</b> |
| <b>Disease duration</b> | 0.98      | 0.94–1.015    | 0.215           |

**Table S4: Effect of the relative TL on the time to occurrence of dyskinesia.**

|                        | <b>HR</b> | <b>95% CI</b> | <b>p-value</b> |
|------------------------|-----------|---------------|----------------|
| <b>Telomere length</b> | 0.79      | 0.231–2.67    | 0.698          |

**Adjustment for age at inclusion and disease duration**

|                         | <b>HR</b> | <b>95% CI</b> | <b>p-value</b>  |
|-------------------------|-----------|---------------|-----------------|
| <b>Telomere length</b>  | 0.294     | 0.071–1.21    | 0.0904          |
| <b>Age at inclusion</b> | 0.931     | 0.91–0.95     | <b>2.27e-09</b> |
| <b>Disease duration</b> | 0.958     | 0.92–1.0013   | 0.0571          |
